# Supplementary material for: Identification of Quantitative Trait Loci Controlling Root Morphological Traits in an Interspecific Soybean Population Using 2D Imagery Data
Source: MDPI journal article supplement (doi:10.3390/ijms25094687), 2024-04-25
Supplement: s1 [file s1]

**Table S1.** List of 198 putative genes with annotation function within the two most significant flanking regions of chromosomes 3 and 13 of soybean mapping populations.

| Traits          | Chr. | Flanking region          | Gene name              | Description (function)                                               |
|-----------------|------|--------------------------|------------------------|----------------------------------------------------------------------|
| AD<br>RV<br>LAD | 03   | Gm03:829023..<br>3365988 | <i>Glyma.03G010700</i> | RIBOFLAVIN BIOSYNTHESIS PROTEIN RIBS                                 |
|                 |      |                          | <i>Glyma.03G011200</i> | AT HOOK MOTIF DNA BINDING FAMILY PROTEIN                             |
|                 |      |                          | <i>Glyma.03G017900</i> | UDPGALACTOSE/UDP GLUCOSE TRANSPORTER 2                               |
|                 |      |                          | <i>Glyma.03G020300</i> | SERINE/THREONINE PROTEIN KINASE AURORA3                              |
|                 |      |                          | <i>Glyma.03G013700</i> | DOWNSTREAM TARGET OF AGL15 2                                         |
|                 |      |                          | <i>Glyma.03G011000</i> | BR SIGNALING KINASE 3-RELATED                                        |
|                 |      |                          | <i>Glyma.03G008600</i> | SIGNAL PEPTIDE PEPTIDASEL IKE 4                                      |
|                 |      |                          | <i>Glyma.03G010200</i> | PLANT PHOSPHORIBOSYLTRANSFERASE C-TERMINAL (PRT_C)                   |
|                 |      |                          | <i>Glyma.03G014900</i> | ATP-DEPENDENT RNA HELICASE DDX47-RELATED                             |
|                 |      |                          | <i>Glyma.03G009900</i> | FBOX/KELCHREPEAT PROTEIN SKIP4-RELATED                               |
|                 |      |                          | <i>Glyma.03G013300</i> | MYB-LIKE DNA BINDING PROTEIN MYB                                     |
|                 |      |                          | <i>Glyma.03G021300</i> | EPIDIDYMAL MEMBRANE PROTEIN E9-RELATED                               |
|                 |      |                          | <i>Glyma.03G009800</i> | ACYLCOA THIOESTERASE                                                 |
|                 |      |                          | <i>Glyma.03G016000</i> | BON1-ASSOCIATED PROTEIN 1-RELATED                                    |
|                 |      |                          | <i>Glyma.03G021700</i> | SERINE/THREONINE PROTEIN KINASE AURORA3                              |
|                 |      |                          | <i>Glyma.03G025900</i> | GENOMIC DNA, CHROMOSOME 3, P1 CLONE: MDJ14-RELATED                   |
|                 |      |                          | <i>Glyma.03G019400</i> | AGAMOUS-LIKE MADSBOX PROTEIN AGL13-RELATED                           |
|                 |      |                          | <i>Glyma.03G029800</i> | AXIAL REGULATOR YABBY 1-RELATED                                      |
|                 |      |                          | <i>Glyma.03G022900</i> | PROTEIN BOI2                                                         |
|                 |      |                          | <i>Glyma.03G027000</i> | PLANT PROTEIN OF UNKNOWN FUNCTION (DUF247)                           |
|                 |      |                          | <i>Glyma.03G025400</i> | ZINC FINGER PROTEIN 183                                              |
|                 |      |                          | <i>Glyma.03G029100</i> | PECTINESTERASE/PECTINESTERASE INHIBITOR 17-RELATED                   |
|                 |      |                          | <i>Glyma.03G011900</i> | HELITRON HELICASE-LIKE DOMAIN AT N-TERMINUS (HELITRON_LIKE_N)        |
|                 |      |                          | <i>Glyma.03G025500</i> | PROTEIN S-ACYL TRANSFERASE 13-RELATED                                |
|                 |      |                          | <i>Glyma.03G018300</i> | POLYNUCLEOTIDYL TRANSFERASE, RIBONUCLEASE H-LIKE SUPERFAMILY PROTEIN |
|                 |      |                          | <i>Glyma.03G017200</i> | ALTERNATIVE SPLICING FACTOR SRP55/B52/SRP75 (RRM SUPERFAMILY)        |
|                 |      |                          | <i>Glyma.03G012000</i> | FAS-ASSOCIATED PROTEIN                                               |
|                 |      |                          | <i>Glyma.03G029200</i> | PECTINESTERASE/PECTINESTERASE INHIBITOR 17-RELATED                   |
|                 |      |                          | <i>Glyma.03G022800</i> | CALCIUM BINDING PROTEIN CML24-RELATED                                |
|                 |      |                          | <i>Glyma.03G027500</i> | TRANSKETOLASE/GLYCOALDEHYDE TRANSFERASE                              |
|                 |      |                          | <i>Glyma.03G024300</i> | CHITINASE/POLYBETAGLUCOSAMINIDASE                                    |

|     |  |                        |                                                                                         |
|-----|--|------------------------|-----------------------------------------------------------------------------------------|
|     |  | <i>Glyma.03G028900</i> | PECTINESTERASE/PECTINESTERASE INHIBITOR 36-RELATED                                      |
|     |  | <i>Glyma.03G028000</i> | ARGINASE/CANAVANASE                                                                     |
|     |  | <i>Glyma.03G024000</i> | ATP-DEPENDENT RNA HELICASE DHX37-RELATED                                                |
|     |  | <i>Glyma.03G022300</i> | 4 HYDROXYTETRAHYDRODIPICOLINATE SYNTHASE/DIHYDRODIPICOLINATE SYNTHETASE                 |
|     |  | <i>Glyma.03G029000</i> | PECTINESTERASE/PECTINESTERASE INHIBITOR 17-RELATED                                      |
|     |  | <i>Glyma.03G020800</i> | C2 CALCIUM/LIPID BINDING ENDONUCLEASE/-EXONUCLEASE/PHOSPHATASE-RELATED                  |
|     |  | <i>Glyma.03G013500</i> | ROP GUANINE NUCLEOTIDE EXCHANGE FACTOR 2-RELATED                                        |
|     |  | <i>Glyma.03G019600</i> | TRANSCRIPTIONAL COREPRESSOR COMPONENT                                                   |
|     |  | <i>Glyma.03G027400</i> | 3PHOSPHOSHIKIMATE 1 CARBOXYVINYLTRANSFERASE/EPSP SYNTHASE                               |
|     |  | <i>Glyma.03G028700</i> | ACETYL COA-BENZYL ALCOHOL ACETYL TRANSFERASE-LIKE PROTEIN-RELATED                       |
|     |  | <i>Glyma.03G016600</i> | HOMEODOMAIN (HOMEODOMAIN)/START DOMAIN (START)                                          |
|     |  | <i>Glyma.03G022700</i> | ATHOOK MOTIF NUCLEAR LOCALIZED PROTEIN 18-RELATED                                       |
|     |  | <i>Glyma.03G012200</i> | PROTEIN SAY1                                                                            |
|     |  | <i>Glyma.03G026600</i> | PROTEIN OF UNKNOWN FUNCTION                                                             |
|     |  | <i>Glyma.03G030100</i> | CYTOCHROME P450 71B21-RELATED                                                           |
|     |  | <i>Glyma.03G027200</i> | PROTEIN KINASE DOMAIN (PKINASE)/LEUCINE RICH REPEAT (LRR_8)                             |
|     |  | <i>Glyma.03G017100</i> | ARMADILLO/BETACATENIN REPEAT CONTAINING PROTEIN-RELATED                                 |
|     |  | <i>Glyma.03G016200</i> | BON1-ASSOCIATED PROTEIN 1-RELATED                                                       |
| AD  |  | <i>Glyma.03G012800</i> | KDEL LYSASPGULEU CONTAINING-RELATED                                                     |
| RV  |  | <i>Glyma.03G027800</i> | PPR REPEAT (PPR)/PPR REPEAT FAMILY (PPR_2)                                              |
| LAD |  | <i>Glyma.03G018500</i> | ARSENITE-TRANSPORTING ATPASE/ARSENITE-TRANSLOCATING ATPASE                              |
|     |  | <i>Glyma.03G024500</i> | CHITINASE/POLYBETAGLUCOSAMINIDASE                                                       |
|     |  | <i>Glyma.03G024700</i> | SULFATE TRANSPORTER 3.3-RELATED                                                         |
|     |  | <i>Glyma.03G028400</i> | PLANT PROTEIN OF UNKNOWN FUNCTION (DUF641) (DUF641)                                     |
|     |  | <i>Glyma.03G026400</i> | EXOCYST COMPLEX COMPONENT SEC6-RELATED                                                  |
|     |  | <i>Glyma.03G013600</i> | ADENOSINE-DEAMINASE (EDITASE) DOMAIN (A_DEAMIN)                                         |
|     |  | <i>Glyma.03G021200</i> | GERANIOL 8 HYDROXYLASE/CYTOCHROME P450, FAMILY 76, SUBFAMILY C, POLYPEPTIDE 4           |
|     |  | <i>Glyma.03G029600</i> | AUXIN REGULATED PROTEIN-RELATED                                                         |
|     |  | <i>Glyma.03G015400</i> | EXTENDED SYNAPTOTAGMIN-RELATED                                                          |
|     |  | <i>Glyma.03G023700</i> | PROTEIN KINASE DOMAIN (PKINASE)/LEUCINE RICH REPEAT (LRR_1)/LEUCINE RICH REPEAT (LRR_8) |
|     |  |                        |                                                                                         |

|  |  |                        |                                                                                             |
|--|--|------------------------|---------------------------------------------------------------------------------------------|
|  |  | <i>Glyma.03G014500</i> | DEHYDROGENASES WITH DIFFERENT SPECIFICITIES (RELATED TO SHORT CHAIN ALCOHOL DEHYDROGENASES) |
|  |  | <i>Glyma.03G019300</i> | MADSBX PROTEIN SOC1                                                                         |
|  |  | <i>Glyma.03G009400</i> | PREDICTED CA <sup>2+</sup> -DEPENDENT PHOSPHOLIPID BINDING PROTEIN                          |
|  |  | <i>Glyma.03G014800</i> | AUXIN RESPONSIVE PROTEIN (AUXIN_INDUCIBLE)                                                  |
|  |  | <i>Glyma.03G013100</i> | MITOCHONDRIAL RIBOSOMAL PROTEIN S33                                                         |
|  |  | <i>Glyma.03G012900</i> | KDEL LYSASPGULEU CONTAINING-RELATED                                                         |
|  |  | <i>Glyma.03G026100</i> | EXOCYST COMPLEX COMPONENT 3                                                                 |
|  |  | <i>Glyma.03G026700</i> | PPR REPEAT (PPR)//PPR REPEAT FAMILY (PPR_2)                                                 |
|  |  | <i>Glyma.03G019500</i> | PROTEIN Y45F10A.7, ISOFORM A                                                                |
|  |  | <i>Glyma.03G013400</i> | REMORIN, NTERMINAL REGION (REMORIN_N)                                                       |
|  |  | <i>Glyma.03G020400</i> | CYTOCHROME P450, FAMILY 704, SUBFAMILY A, POLYPEPTIDE 1                                     |
|  |  | <i>Glyma.03G028800</i> | METHIONINE AMINOPEPTIDASE 1                                                                 |
|  |  | <i>Glyma.03G025800</i> | GENOMIC DNA, CHROMOSOME 3, P1 CLONE: MDJ14-RELATED                                          |
|  |  | <i>Glyma.03G009200</i> | MEDIATOR OF RNA POLYMERASE II TRANSCRIPTION SUBUNIT 12                                      |
|  |  | <i>Glyma.03G015700</i> | FAST LEU-RICH DOMAIN CONTAINING                                                             |
|  |  | <i>Glyma.03G023500</i> | AT HOOK MOTIF DNA BINDING FAMILY PROTEIN                                                    |
|  |  | <i>Glyma.03G020100</i> | EXPRESSED PROTEIN                                                                           |
|  |  | <i>Glyma.03G027900</i> | PREDICTED METALLOPROTEASE WITH CHAPERONE ACTIVITY (RNASE H/HSP70 FOLD)                      |
|  |  | <i>Glyma.03G021100</i> | RIBOSOMAL RNA PROCESSING PROTEIN 36 HOMOLOG                                                 |
|  |  | <i>Glyma.03G018200</i> | POLYNUCLEOTIDYL TRANSFERASE, RIBONUCLEASE H-LIKE SUPERFAMILY PROTEIN                        |
|  |  | <i>Glyma.03G016400</i> | BON1-ASSOCIATED PROTEIN 1-RELATED                                                           |
|  |  | <i>Glyma.03G016700</i> | METHYLTRANSFERASE PMT13-RELATED                                                             |
|  |  | <i>Glyma.03G019100</i> | SUBTILASE FAMILY PROTEIN-RELATED                                                            |
|  |  | <i>Glyma.03G022200</i> | LITTLE ZIPPER 1 PROTEIN-RELATED                                                             |
|  |  | <i>Glyma.03G029900</i> | CYTOCHROME P450 71B21-RELATED                                                               |
|  |  | <i>Glyma.03G015100</i> | DTDP4DEHYDRORHAMNOSE REDUCTASE                                                              |
|  |  | <i>Glyma.03G025300</i> | ABSCISIC ACID RECEPTOR PYL10-RELATED                                                        |
|  |  | <i>Glyma.03G009500</i> | TRANSCRIPTION FACTOR MYC1                                                                   |
|  |  | <i>Glyma.03G016500</i> | SHAGGY-RELATED PROTEIN KINASE BETA-RELATED                                                  |
|  |  | <i>Glyma.03G027600</i> | DNA REPAIR PROTEIN RAD51 HOMOLOG 3                                                          |
|  |  | <i>Glyma.03G019800</i> | GIBBERELLIN 20 OXIDASE 1-RELATED                                                            |
|  |  | <i>Glyma.03G029300</i> | ENTH/VHS/GAT FAMILY PROTEIN                                                                 |
|  |  | <i>Glyma.03G015600</i> | CELL DIVISION PROTEIN FTSY HOMOLOG, CHLOROPLASTIC                                           |
|  |  | <i>Glyma.03G017500</i> | RING FINGER DOMAIN CONTAINING                                                               |
|  |  | <i>Glyma.03G023100</i> | LOB DOMAIN CONTAINING PROTEIN 19-RELATED                                                    |
|  |  | <i>Glyma.03G021900</i> | GROWTH REGULATING FACTOR 9                                                                  |

|     |    |              |                        |                                                        |
|-----|----|--------------|------------------------|--------------------------------------------------------|
|     |    |              | <i>Glyma.03G021800</i> | NADHUBIQUINONE OXIDOREDUCTASE                          |
|     |    |              | <i>Glyma.03G017000</i> | FBOX PROTEIN PP2A13                                    |
|     |    |              | <i>Glyma.03G020500</i> | MEMBER OF "GDXG" FAMILY OF LIPOLYTIC ENZYMES           |
|     |    |              |                        |                                                        |
| AD  | 13 | Gm13:2752708 | <i>Glyma.13G175000</i> | DUF679 DOMAIN MEMBRANE PROTEIN 7                       |
| RV  |    | 3..43496306  | <i>Glyma.13G310900</i> | RING ZINC FINGER PROTEIN                               |
| LAD |    |              | <i>Glyma.13G172800</i> | RAS-RELATED PROTEIN RABA1G                             |
|     |    |              | <i>Glyma.13G171200</i> | RIBOSOMAL RNA PROCESSING PROTEIN 7-RELATED             |
|     |    |              | <i>Glyma.13G165200</i> | 40S RIBOSOMAL PROTEIN S11 FAMILY MEMBER                |
|     |    |              | <i>Glyma.13G177300</i> | MITOCHONDRIAL ARGININE TRANSPORTER BAC1                |
|     |    |              | <i>Glyma.13G159900</i> | SMALL NUCLEAR RNA ACTIVATING COMPLEX, POLYPEPTIDE 1    |
|     |    |              | <i>Glyma.13G226900</i> | PROTEIN OF UNKNOWN FUNCTION (DUF1685) (DUF1685)        |
|     |    |              | <i>Glyma.13G172200</i> | APOPTOSIS INHIBITOR 5                                  |
|     |    |              | <i>Glyma.13G175600</i> | DROUGHT INDUCED 19 PROTEIN (DI19), ZINC BINDING        |
|     |    |              | <i>Glyma.13G162300</i> | UBIQUITIN SPECIFIC PROTEASE                            |
|     |    |              | <i>Glyma.13G178200</i> | NON-SENSE-MEDIATED mRNA DECAY PROTEIN                  |
|     |    |              | <i>Glyma.13G173500</i> | 2HYDROXYISOFLAVANONE SYNTHASE/ISOFLAVONOID SYNTHASE    |
|     |    |              | <i>Glyma.13G172700</i> | HOMEODOMAIN (HOMEODOMAIN)                              |
|     |    |              | <i>Glyma.13G173600</i> | O-METHYL TRANSFERASE                                   |
|     |    |              | <i>Glyma.13G170700</i> | POTASSIUM TRANSPORTER 8                                |
|     |    |              | <i>Glyma.13G161400</i> | XYLOGALACTURONAN BETA-1,3-XYLOSYLTRANSFERASE           |
|     |    |              | <i>Glyma.13G167600</i> | SOLUTE CARRIER FAMILY 35                               |
|     |    |              | <i>Glyma.13G167500</i> | GLYCOSYLTRANSFERASE 14 FAMILY MEMBER                   |
|     |    |              | <i>Glyma.13G162500</i> | ARP2/3 COMPLEX 21 KD SUBUNIT                           |
|     |    |              | <i>Glyma.13G176400</i> | POLYUBIQUITIN 3                                        |
|     |    |              | <i>Glyma.13G168600</i> | PROTEIN FARNESYLTRANSFERASE SUBUNIT BETA               |
|     |    |              | <i>Glyma.13G160400</i> | HYDROPHOBIC SEED PROTEIN (HYDROPHOB_SEED)              |
|     |    |              | <i>Glyma.13G166000</i> | HISTON ELYSINE N-METHYL TRANSFERASE, H3 LYSINE9 SP     |
|     |    |              | <i>Glyma.13G173100</i> | HISTONE H3                                             |
|     |    |              | <i>Glyma.13G167100</i> | PEROXIDASE 25                                          |
|     |    |              | <i>Glyma.13G167900</i> | RIBOSOME BIOGENESIS REGULATORY PROTEIN                 |
|     |    |              | <i>Glyma.13G196900</i> | DNA DIRECTED RNA POLYMERASE V SUBUNIT 1                |
|     |    |              | <i>Glyma.13G168800</i> | PLASTOCYANIN-LIKE DOMAIN (CU_BIND_LIKE)                |
|     |    |              | <i>Glyma.13G175100</i> | SOLUTE CARRIER FAMILY 35                               |
|     |    |              | <i>Glyma.13G224000</i> | MOLECULAR CHAPERONES GRP78/BIP/KAR2, HSP70 SUPERFAMILY |
|     |    |              | <i>Glyma.13G165700</i> | EQUILIBRATIVE NUCLEOTIDE TRANSPORTER 8                 |
|     |    |              | <i>Glyma.13G174800</i> | PROTEIN KINASE FAMILY PROTEIN                          |

|  |  |  |                        |                                                                                                                        |
|--|--|--|------------------------|------------------------------------------------------------------------------------------------------------------------|
|  |  |  | <i>Glyma.13G166200</i> | FBOX-LIKE (FBOX-LIKE)//LEUCINE-RICH REPEAT                                                                             |
|  |  |  | <i>Glyma.13G265400</i> | RING BOX                                                                                                               |
|  |  |  | <i>Glyma.13G244500</i> | PROTEIN OF UNKNOWN FUNCTION (DUF707) (DUF707)                                                                          |
|  |  |  | <i>Glyma.13G174900</i> | RECEPTORL IKE PROTEIN KINASE HSL1                                                                                      |
|  |  |  | <i>Glyma.13G268600</i> | PLUG DOMAIN OF SEC61P (PLUG_TRANSLOCON)                                                                                |
|  |  |  | <i>Glyma.13G159800</i> | BED FINGER-RELATED                                                                                                     |
|  |  |  | <i>Glyma.13G169000</i> | CALCIUM HOMEOSTASIS REGULATOR-RELATED                                                                                  |
|  |  |  | <i>Glyma.13G174300</i> | XBOX TRANSCRIPTION FACTOR-RELATED                                                                                      |
|  |  |  | <i>Glyma.13G168700</i> | 2HYDROXYACID DEHYDROGENASE-RELATED                                                                                     |
|  |  |  | <i>Glyma.13G190400</i> | LEUCINE-RICH REPEAT CONTAINING PROTEIN                                                                                 |
|  |  |  | <i>Glyma.13G176700</i> | PROTEASOME SUBUNIT ALPHA TYPE1                                                                                         |
|  |  |  | <i>Glyma.13G172000</i> | IQDOMAIN 9 PROTEIN                                                                                                     |
|  |  |  | <i>Glyma.13G172500</i> | ZINC FINGER FYVE DOMAIN CONTAINING PROT                                                                                |
|  |  |  | <i>Glyma.13G169700</i> | BIDIRECTIONAL SUGAR TRANSPORTER SWEET4-RELATED                                                                         |
|  |  |  | <i>Glyma.13G165500</i> | RING FINGER DOMAIN CONTAINING                                                                                          |
|  |  |  | <i>Glyma.13G336600</i> | EXPANSINA6                                                                                                             |
|  |  |  | <i>Glyma.13G337300</i> | SCARECROW-LIKE PROTEIN 14-RELATED                                                                                      |
|  |  |  | <i>Glyma.13G330900</i> | CHITINASE                                                                                                              |
|  |  |  | <i>Glyma.13G332000</i> | COPPER TRANSPORT PROTEIN ATOX1-RELATED                                                                                 |
|  |  |  | <i>Glyma.13G328800</i> | NODULIN (NODULIN)                                                                                                      |
|  |  |  | <i>Glyma.13G337100</i> | PROTEIN TBF1                                                                                                           |
|  |  |  | <i>Glyma.13G338100</i> | MULTICOPPER OXIDASE                                                                                                    |
|  |  |  | <i>Glyma.13G329500</i> | PROTEIN NRT1/PTR FAMILY 2.1-RELATED                                                                                    |
|  |  |  | <i>Glyma.13G334200</i> | RNA AND EXPORT FACTOR BINDING PROTEIN                                                                                  |
|  |  |  | <i>Glyma.13G329000</i> | DOF ZINC FINGER PROTEIN DOF1.1-RELATED                                                                                 |
|  |  |  | <i>Glyma.13G338300</i> | ZINC/IRON TRANSPORTER                                                                                                  |
|  |  |  | <i>Glyma.13G343600</i> | PROTEIN<br>FARNESYLTRANSFERASE/FTASE//PROTEINGERANYL<br>GERANYL-TRANSFERASE TYPE I                                     |
|  |  |  | <i>Glyma.13G335600</i> | ACTIN                                                                                                                  |
|  |  |  | <i>Glyma.13G338000</i> | DVL13-RELATED                                                                                                          |
|  |  |  | <i>Glyma.13G335900</i> | PHOSPHATIDYLINOSITOL NACETYL-<br>GLUCOSAMINYL TRANSFERASE SUBUNIT P DOWN<br>SYNDROME CRITICAL REGION PROTEIN 5-RELATED |
|  |  |  | <i>Glyma.13G337500</i> | SCARECROW-LIKE PROTEIN 11-RELATED                                                                                      |
|  |  |  | <i>Glyma.13G329700</i> | ETHYLENE RESPONSIVE TRANSCRIPTION FACTOR<br>RAP27                                                                      |
|  |  |  | <i>Glyma.13G330400</i> | FLIPPASE KINASE 1-RELATED                                                                                              |
|  |  |  | <i>Glyma.13G341500</i> | DNADAMAGEREPAIR/TOLERATION PROTEIN<br>DRT100-RELATED                                                                   |
|  |  |  | <i>Glyma.13G336100</i> | OUTER ENVELOPE PORE PROTEIN 161,<br>CHLOROPLASTIC                                                                      |
|  |  |  | <i>Glyma.13G331300</i> | RECEPTORL IKE PROTEIN KINASE HERK 1                                                                                    |

|  |  |                        |                                                                                  |
|--|--|------------------------|----------------------------------------------------------------------------------|
|  |  | <i>Glyma.13G330600</i> | KINESIN MOTOR PROTEIN-RELATED                                                    |
|  |  | <i>Glyma.13G334300</i> | HISTONE 2A                                                                       |
|  |  | <i>Glyma.13G332700</i> | 60S RIBOSOMAL PROTEIN L23A                                                       |
|  |  | <i>Glyma.13G331700</i> | EXOCYST COMPLEX PROTEIN EXO70                                                    |
|  |  | <i>Glyma.13G330300</i> | RING FRINGE-RELATED                                                              |
|  |  | <i>Glyma.13G338700</i> | PROTEIN TOC753, CHLOROPLASTIC-RELATED                                            |
|  |  | <i>Glyma.13G333300</i> | METHYLCPGBINDING DOMAIN CONTAINING PROTEIN 1-RELATED                             |
|  |  | <i>Glyma.13G342700</i> | ANTHRANILATE PHOSPHORIBOSYL TRANSFERASE-LIKE PROTEIN                             |
|  |  | <i>Glyma.13G338200</i> | ZINC/IRON TRANSPORTER                                                            |
|  |  | <i>Glyma.13G333200</i> | TRANSCRIPTION FACTOR MYB48-RELATED                                               |
|  |  | <i>Glyma.13G342500</i> | ETHYLENE INSENSITIVE 3-LIKE 3 PROTEIN                                            |
|  |  | <i>Glyma.13G341600</i> | PROTEIN FAR1-RELATED SEQUENCE 4                                                  |
|  |  | <i>Glyma.13G331900</i> | 60S RIBOSOMAL PROTEIN L35                                                        |
|  |  | <i>Glyma.13G330800</i> | CHITINASE                                                                        |
|  |  | <i>Glyma.13G333800</i> | HISTONE 2A                                                                       |
|  |  | <i>Glyma.13G339700</i> | MITOCHONDRIAL IMPORT INNER MEMBRANE TRANSLOCASE SUBUNIT TIM10                    |
|  |  | <i>Glyma.13G341100</i> | PROTEIN TYROSINE KINASE (PKINASE_TYR)//TPR REPEAT (TPR_11)                       |
|  |  | <i>Glyma.13G338400</i> | RING ZINC FINGER PROTEIN                                                         |
|  |  | <i>Glyma.13G338600</i> | DNAJ HOMOLOG SUBFAMILY C MEMBER                                                  |
|  |  | <i>Glyma.13G342000</i> | HISTONE H3                                                                       |
|  |  | <i>Glyma.13G340400</i> | E3 UBIQUITIN LIGASE BIG BROTHER                                                  |
|  |  | <i>Glyma.13G340900</i> | PROTEIN ZNTB                                                                     |
|  |  | <i>Glyma.13G335300</i> | E3 UBIQUITINPROTEIN LIGASE XBAT31-RELATED                                        |
|  |  | <i>Glyma.13G333100</i> | AQUAPORIN TRANSPORTER                                                            |
|  |  | <i>Glyma.13G333900</i> | HISTONE 2A                                                                       |
|  |  | <i>Glyma.13G341400</i> | AGC (CAMP-DEPENDENT, CGMP-DEPEN-DENT AND PROTEIN KINASE C) KINASE FAMILY PROTEIN |
|  |  | <i>Glyma.13G343000</i> | GLYCOSYL HYDROLASE                                                               |
|  |  | <i>Glyma.13G340100</i> | ORIGIN RECOGNITION COMPLEX SUBUNIT 1                                             |

**Table S2.** List of SNP variations between ‘William 82’ and ‘PI366121’ along with the genes underlying the most significant root QTL genomic regions.

| Position       | Gene                   | Ref | ALT | Effect                  | Start      | End        | Strand |
|----------------|------------------------|-----|-----|-------------------------|------------|------------|--------|
| Chr03:1040647  | <i>Glyma.03G010700</i> | A   | T   | 3_prime_UTR_variant     | 1,037,842  | 1,042,141  | +      |
| Chr03:1789064  | <i>Glyma.03G017900</i> | T   | C   | Upstream gene variant   | 1,787,790  | 1,800,965  | +      |
| Chr03:2075749  | <i>Glyma.03G020300</i> | G   | T/A | Upstream gene variant   | 2,074,821  | 2,078,561  | -      |
| Chr03:1393538  | <i>Glyma.03G013700</i> | G   | T   | Missense variant        | 1,393,484  | 1,393,734  | +      |
| Chr03:831779   | <i>Glyma.03G008600</i> | C   | G   | Downstream gene variant | 830,451    | 838,408    | -      |
| Chr03:1496887  | <i>Glyma.03G014900</i> | G   | C   | Downstream gene variant | 1,494,708  | 1,502,910  | -      |
| Chr03:2805098  | <i>Glyma.03G025900</i> | G   | A   | Synonymous variant      | 2,804,898  | 2,805,383  | +      |
| Chr03:1981263  | <i>Glyma.03G019400</i> | A   | G   | Intron variant          | 1,977,661  | 1,985,026  | -      |
| Chr03:2413616  | <i>Glyma.03G022900</i> | C   | T   | Missense variant        | 2,413,172  | 2,413,671  | -      |
| Chr03:1738562  | <i>Glyma.03G017200</i> | G   | A   | 5_prime_UTR_variant     | 1,735,158  | 1,738,810  | -      |
| Chr03:3186369  | <i>Glyma.03G029200</i> | T   | G   | Synonymous variant      | 3,185,979  | 3,188,159  | -      |
| Chr03:3022150  | <i>Glyma.03G027500</i> | C   | T   | Synonymous variant      | 3,022,087  | 3,022,240  | -      |
| Chr03:3151051  | <i>Glyma.03G028900</i> | G   | A   | Intron variant          | 3,148,672  | 3,152,887  | -      |
| Chr03:3072041  | <i>Glyma.03G028000</i> | G   | C   | Missense variant        | 3,071,857  | 3,072,066  | -      |
| Chr03:3165706  | <i>Glyma.03G029000</i> | C   | T   | Intron variant          | 3,164,736  | 3,166,769  | +      |
| Chr03:2124946  | <i>Glyma.03G020800</i> | A   | G   | 3_prime_UTR_variant     | 2,124,895  | 2,135,692  | -      |
| Chr03:2009608  | <i>Glyma.03G019600</i> | G   | C   | 3_prime_UTR_variant     | 2,007,617  | 2,009,871  | +      |
| Chr03:3010747  | <i>Glyma.03G027400</i> | C   | T   | Missense variant        | 3,010,213  | 3,018,498  | -      |
| Chr03:3128983  | <i>Glyma.03G028700</i> | A   | G   | Missense variant        | 3,128,776  | 3,130,648  | +      |
| Chr03:2998840  | <i>Glyma.03G027200</i> | A   | G   | Missense variant        | 2,997,332  | 2,999,026  | +      |
| Chr03:1295079  | <i>Glyma.03G012800</i> | A   | G   | Intron variant          | 1,292,400  | 1,298,429  | -      |
| Chr03:1852211  | <i>Glyma.03G018500</i> | A   | C   | Intron variant          | 1,849,093  | 1,855,316  | +      |
| Chr03:3109886  | <i>Glyma.03G028400</i> | T   | C   | Missense variant        | 3,107,378  | 3,110,786  | +      |
| Chr03:2902943  | <i>Glyma.03G026400</i> | C   | G   | Intron variant          | 2,892,021  | 2,904,360  | +      |
| Chr03:1385095  | <i>Glyma.03G013600</i> | CA  | C   | Intron variant          | 1,379,993  | 1,390,392  | +      |
| Chr03:2171360  | <i>Glyma.03G021200</i> | G   | A   | Downstream gene variant | 2,170,567  | 2,172,891  | -      |
| Chr03:3253737  | <i>Glyma.03G029600</i> | T   | C   | 3_prime_UTR_variant     | 3,253,478  | 3,255,163  | -      |
| Chr03:1452530  | <i>Glyma.03G014500</i> | C   | T   | Missense variant        | 1,452,354  | 1,452,677  | -      |
| Chr03:2490109  | <i>Glyma.03G023500</i> | C   | A   | Intron variant          | 2,486,847  | 2,493,916  | +      |
| Chr03:2061229  | <i>Glyma.03G020100</i> | A   | C   | Missense variant        | 2,057,797  | 2,063,029  | -      |
| Chr03:3053137  | <i>Glyma.03G027900</i> | T   | C   | Intron variant          | 3,048,805  | 3,061,575  | -      |
| Chr03:2164039  | <i>Glyma.03G021100</i> | C   | T   | Splice region variant   | 2,162,406  | 2,167,712  | +      |
| Chr03:3029835  | <i>Glyma.03G027600</i> | A   | G   | Splice region variant   | 3,029,154  | 3,033,239  | -      |
| Chr03:2043655  | <i>Glyma.03G019800</i> | T   | G   | Synonymous variant      | 2,043,161  | 2,043,723  | +      |
| Chr03:3225850  | <i>Glyma.03G029300</i> | T   | C   | Synonymous variant      | 3,225,772  | 3,226,185  | -      |
| Chr03:1547374  | <i>Glyma.03G015600</i> | A   | G   | Upstream gene variant   | 1,539,775  | 1,548,226  | -      |
| Chr03:2286654  | <i>Glyma.03G021900</i> | G   | T   | Intron variant          | 2,285,871  | 2,289,619  | -      |
| Chr03:2092471  | <i>Glyma.03G020500</i> | G   | A   | Intron variant          | 2,091,153  | 2,093,117  | +      |
| Chr13:28686299 | <i>Glyma.13G172800</i> | G   | C   | Missense variant        | 28,683,493 | 28,686,774 | +      |
| Chr13:28537151 | <i>Glyma.13G171200</i> | T   | C   | Intron variant          | 28,536,983 | 28,540,336 | -      |
| Chr13:29123039 | <i>Glyma.13G177300</i> | C   | A   | 5_prime_UTR_variant     | 29,122,910 | 29,128,171 | +      |
| Chr13:27561946 | <i>Glyma.13G159900</i> | T   | C   | Upstream gene variant   | 27,560,735 | 27,566,769 | +      |
| Chr13:28613474 | <i>Glyma.13G172200</i> | A   | G   | Downstream gene variant | 28,612,286 | 28,620,441 | -      |
| Chr13:27774334 | <i>Glyma.13G162300</i> | G   | T   | 3_prime_UTR_variant     | 27,773,991 | 27,778,719 | -      |
| Chr13:28672639 | <i>Glyma.13G172700</i> | T   | A   | Missense variant        | 28,671,831 | 28,675,231 | +      |

|                |                        |   |   |                         |            |            |    |
|----------------|------------------------|---|---|-------------------------|------------|------------|----|
| Chr13:28488019 | <i>Glyma.13G170700</i> | G | C | 5_prime_UTR_variant     | 28,487,838 | 28,494,611 | +  |
| Chr13:27700711 | <i>Glyma.13G161400</i> | C | T | Downstream gene variant | 27,698,462 | 27,701,365 | -; |
| Chr13:28211158 | <i>Glyma.13G167600</i> | T | G | Synonymous variant      | 28,210,440 | 28,212,300 | +  |
| Chr13:27786625 | <i>Glyma.13G162500</i> | A | T | Upstream gene variant   | 27,785,225 | 27,788,045 | -  |
| Chr13:28303515 | <i>Glyma.13G168600</i> | G | A | Missense variant        | 28,298,272 | 28,304,199 | -  |
| Chr13:27606195 | <i>Glyma.13G160400</i> | C | T | 3_prime_UTR_variant     | 27,606,020 | 27,608,359 | -  |
| Chr13:28720934 | <i>Glyma.13G173100</i> | C | T | Synonymous variant      | 28,720,656 | 28,721,572 | +  |
| Chr13:28182349 | <i>Glyma.13G167100</i> | T | A | Missense variant        | 28,182,121 | 28,182,399 | +  |
| Chr13:28240930 | <i>Glyma.13G167900</i> | T | G | Upstream gene variant   | 28,240,381 | 28,243,803 | +  |
| Chr13:31057839 | <i>Glyma.13G196900</i> | T | G | Downstream gene variant | 31,055,891 | 31,072,513 | +  |
| Chr13:28317204 | <i>Glyma.13G168800</i> | C | T | Upstream gene variant   | 28,316,886 | 28,317,715 | +  |
| Chr13:28970569 | <i>Glyma.13G175100</i> | A | C | Downstream gene variant | 28,969,904 | 28,975,782 | +  |
| Chr13:33685460 | <i>Glyma.13G224000</i> | T | A | Missense variant        | 33,684,833 | 33,686,902 | +  |
| Chr13:28928217 | <i>Glyma.13G174800</i> | A | G | Synonymous variant      | 28,927,266 | 28,928,267 | -  |
| Chr13:28096911 | <i>Glyma.13G166200</i> | G | A | Intron variant          | 28,093,807 | 28,097,420 | -  |
| Chr13:35388368 | <i>Glyma.13G244500</i> | T | A | Upstream gene variant   | 35,387,923 | 35,395,610 | +  |
| Chr13:28938817 | <i>Glyma.13G174900</i> | A | C | Synonymous variant      | 28,938,189 | 28,940,823 | -  |
| Chr13:28305241 | <i>Glyma.13G168700</i> | C | T | Splice donor variant    | 28,305,098 | 28,310,222 | +  |
| Chr13:30403159 | <i>Glyma.13G190400</i> | G | T | Missense variant        | 30,402,029 | 30,409,606 | +  |
| Chr13:28595304 | <i>Glyma.13G172000</i> | T | C | Upstream gene variant   | 28,593,222 | 28,598,072 | -  |
| Chr13:28645033 | <i>Glyma.13G172500</i> | G | A | Synonymous variant      | 28,644,819 | 28,649,188 | -  |
| Chr13:28367052 | <i>Glyma.13G169700</i> | A | T | Intron variant          | 28,363,094 | 28,367,579 | -  |
| Chr13:28031079 | <i>Glyma.13G165500</i> | A | T | Downstream gene variant | 28,030,788 | 28,034,710 | +  |
| Chr13:42993020 | <i>Glyma.13G336600</i> | A | G | Synonymous variant      | 42,991,934 | 42,993,435 | -  |
| Chr13:42797618 | <i>Glyma.13G334200</i> | T | C | Missense variant        | 42,794,878 | 42,801,645 | +  |
| Chr13:42918068 | <i>Glyma.13G335600</i> | T | A | Synonymous variant      | 42,916,206 | 42,918,785 | +  |
| Chr13:42423055 | <i>Glyma.13G329700</i> | C | T | Intron variant          | 42,422,213 | 42,426,774 | -  |
| Chr13:42503906 | <i>Glyma.13G330400</i> | A | G | Intron variant          | 42,494,484 | 42,509,495 | +  |
| Chr13:43326463 | <i>Glyma.13G341500</i> | C | A | Missense variant        | 43,325,404 | 43,326,510 | -  |
| Chr13:42581208 | <i>Glyma.13G331300</i> | A | T | Synonymous variant      | 42,580,671 | 42,582,344 | -  |
| Chr13:42523190 | <i>Glyma.13G330600</i> | A | T | Missense variant        | 42,523,075 | 42,523,280 | -  |
| Chr13:42807826 | <i>Glyma.13G334300</i> | A | T | Synonymous variant      | 42,807,791 | 42,808,000 | +  |
| Chr13:42687849 | <i>Glyma.13G332700</i> | C | T | 5_prime_UTR_variant     | 42,687,782 | 42,689,387 | +  |
| Chr13:42740451 | <i>Glyma.13G333300</i> | A | T | Synonymous variant      | 42,739,408 | 42,742,467 | -  |
| Chr13:42713462 | <i>Glyma.13G333200</i> | C | A | Synonymous variant      | 42,713,045 | 42,714,681 | -  |
| Chr13:43333456 | <i>Glyma.13G341600</i> | T | C | Missense variant        | 43,331,375 | 43,335,735 | -  |
| Chr13:42650050 | <i>Glyma.13G331900</i> | A | G | Splice region variant   | 42,648,871 | 42,650,712 | -  |
| Chr13:43295111 | <i>Glyma.13G341100</i> | C | A | Downstream gene variant | 43,292,117 | 43,296,459 | -  |
| Chr13:43246090 | <i>Glyma.13G340400</i> | G | A | Splice region variant   | 43,244,791 | 43,246,867 | -  |
| Chr13:43284804 | <i>Glyma.13G340900</i> | A | G | Upstream gene variant   | 43,282,672 | 43,286,972 | -  |
| Chr13:42711332 | <i>Glyma.13G333100</i> | G | A | Missense variant        | 42,711,023 | 42,711,397 | +  |
| Chr13:43311794 | <i>Glyma.13G341400</i> | C | A | Missense variant        | 43,311,148 | 43,312,308 | +  |
| Chr13:43447450 | <i>Glyma.13G343000</i> | G | C | Missense variant        | 43,447,390 | 43,451,125 | -  |
| Chr13:43217945 | <i>Glyma.13G340100</i> | T | A | 3_prime_UTR_variant     | 43,210,673 | 43,218,069 | +  |



**Table S3.** List of candidate genes showing high expression in the root with annotation descriptions.

| GENE NAME              | ANNOTATION DESCRIPTION                                                                     |
|------------------------|--------------------------------------------------------------------------------------------|
| <i>Glyma.03G013700</i> | DOWNSTREAM TARGET OF AGL15 2                                                               |
| <i>Glyma.03G008600</i> | SIGNAL PEPTIDE PEPTIDASE-LIKE 4                                                            |
| <i>Glyma.03G022900</i> | GUANYL-NUCLEOTIDE EXCHANGE FACTOR                                                          |
| <i>Glyma.03G029100</i> | PHOSPHOENOL-PYRUVATE DIKINASE-RELATED                                                      |
| <i>Glyma.03G027500</i> | TRANSKETOLASE/GLYCOALDEHYDE TRANSFERASE                                                    |
| <i>Glyma.03G028000</i> | ARGINASE/CANAVANASE                                                                        |
| <i>Glyma.03G027400</i> | 3PHOSPHOSHIKIMATE 1CARBOXYVINYLTRANSFERASE/EPSP SYNTHASE                                   |
| <i>Glyma.03G028700</i> | TRANSFERASE ACTIVITY, TRANSFERRING ACYL GROUPS OTHER THAN AMINO-ACYL GROUPS                |
| <i>Glyma.03G027200</i> | LEUCINE-RICH REPEAT RECEPTOR-LIKE PROTEIN KINASE                                           |
| <i>Glyma.03G027800</i> | PPR REPEAT (PPR)//PPR REPEAT FAMILY (PPR_2)                                                |
| <i>Glyma.03G028400</i> | PLANT PROTEIN OF UNKNOWN FUNCTION (DUF641) (DUF641)                                        |
| <i>Glyma.03G014500</i> | DEHYDROGENASES WITH DIFFERENT SPECIFICITIES (RELATED TO SHORTCHAIN ALCOHOL DEHYDROGENASES) |
| <i>Glyma.03G020100</i> | NUCLEOTIDYLTRANSFERASE FAMILY PROTEIN                                                      |
| <i>Glyma.03G021100</i> | RIBOSOMAL RNA PROCESSING PROTEIN 36 HOMOLOG                                                |
| <i>Glyma.03G027600</i> | DNA REPAIR PROTEIN RAD51 HOMOLOG 3                                                         |
| <i>Glyma.13G172800</i> | GTPASE RAB11/YPT3, SMALL G PROTEIN SUPERFAMILY                                             |
| <i>Glyma.13G172700</i> | HOMEODOMAIN (HOMEODOMAIN)                                                                  |
| <i>Glyma.13G168600</i> | PROTEIN FARNESYLTRANSFERASE SUBUNIT BETA                                                   |
| <i>Glyma.13G167100</i> | PEROXIDASE 25                                                                              |
| <i>Glyma.13G224000</i> | HEAT SHOCK PROTEIN 70 KDA                                                                  |
| <i>Glyma.13G168700</i> | 2 HYDROXY-ACID DEHYDROGENASE-RELATED                                                       |
| <i>Glyma.13G190400</i> | LEUCINE RICH REPEAT CONTAINING PROTEIN                                                     |
| <i>Glyma.13G172500</i> | ZINC FINGER FYVE DOMAIN CONTAINING PROTEIN                                                 |
| <i>Glyma.13G334200</i> | RNA AND EXPORT FACTOR BINDING PROTEIN                                                      |
| <i>Glyma.13G341500</i> | LEUCINE-RICH REPEAT RECEPTOR-LIKE PROTEIN KINASE                                           |
| <i>Glyma.13G330600</i> | KINESIN MOTOR PROTEIN-RELATED                                                              |
| <i>Glyma.13G341600</i> | PROTEIN FAR1-RELATED SEQUENCE 4                                                            |
| <i>Glyma.13G331900</i> | 60S RIBOSOMAL PROTEIN L35                                                                  |
| <i>Glyma.13G333100</i> | AQUAPORIN TRANSPORTER                                                                      |
| <i>Glyma.13G341400</i> | AGC (cAMP-dependent, cGMP-dependent and protein kinase C) KINASE FAMILY PROTEIN            |
| <i>Glyma.13G343000</i> | GLYCOSYL HYDROLASE                                                                         |
| <i>Glyma.13G340400</i> | RING FINGER DOMAIN-CONTAINING                                                              |

**Table S4.** List of candidate genes with various tissue/organ-specific values in soybean from the ePlant soybean transcriptome data.

| Gene name              | Root   | Root tip | Root stripped | Root hair (24HAI) | Leaves | SAM    | Flower | Green pods | Nodules |
|------------------------|--------|----------|---------------|-------------------|--------|--------|--------|------------|---------|
| <i>Glyma.03G008600</i> | 10.02  | 5.56     | 10.11         | 7.50              | 15.63  | 16.72  | 21.05  | 22.55      | 2.39    |
| <i>Glyma.03G029100</i> | 1.85   | 0.00     | 0.52          | 0.56              | 0.00   | 0.76   | 0.00   | 0.00       | 0.27    |
| <i>Glyma.03G028000</i> | 1.58   | 1.55     | 382.18        | 156.61            | 2.13   | 52.94  | 4.74   | 0.68       | 0.00    |
| <i>Glyma.03G028700</i> | 2.37   | 0.31     | 0.78          | 0.00              | 0.36   | 1.77   | 0.30   | 0.00       | 0.00    |
| <i>Glyma.03G027200</i> | 0.00   | 0.00     | 0.00          | 0.00              | 0.36   | 0.00   | 0.00   | 0.00       | 0.00    |
| <i>Glyma.03G020100</i> | 34.28  | 19.78    | 23.32         | 16.66             | 24.86  | 52.43  | 48.63  | 32.80      | 50.80   |
| <i>Glyma.03G021100</i> | 4.48   | 5.25     | 1.04          | 5.28              | 4.97   | 7.35   | 4.45   | 1.37       | 5.05    |
| <i>Glyma.03G027600</i> | 4.48   | 8.03     | 5.44          | 4.72              | 7.81   | 8.87   | 6.52   | 6.83       | 1.86    |
| <i>Glyma.03G022900</i> | 10.81  | 37.39    | 14.77         | 10.00             | 5.33   | 29.38  | 6.52   | 15.03      | 0.80    |
| <i>Glyma.03G027500</i> | 239.20 | 364.97   | 164.79        | 170.49            | 27.70  | 136.53 | 37.36  | 225.48     | 57.71   |
| <i>Glyma.03G027400</i> | 51.95  | 36.78    | 51.56         | 44.43             | 17.40  | 40.78  | 9.19   | 40.31      | 15.69   |
| <i>Glyma.03G028400</i> | 17.41  | 14.52    | 18.14         | 14.72             | 10.65  | 19.00  | 11.86  | 14.35      | 15.96   |
| <i>Glyma.03G014500</i> | 13.98  | 9.89     | 4.40          | 8.89              | 1.07   | 0.76   | 0.30   | 0.68       | 0.80    |
| <i>Glyma.13G172800</i> | 2.64   | 5.56     | 3.89          | 5.55              | 1.07   | 2.53   | 3.56   | 2.73       | 2.13    |
| <i>Glyma.13G172700</i> | 0.00   | 0.00     | 0.00          | 0.28              | 0.00   | 0.00   | 0.00   | 0.68       | 0.00    |
| <i>Glyma.13G168600</i> | 8.44   | 17.61    | 19.69         | 8.89              | 9.23   | 16.97  | 10.67  | 13.67      | 16.49   |
| <i>Glyma.13G167100</i> | 1.85   | 0.00     | 2.33          | 0.28              | 4.26   | 0.25   | 2.08   | 1.37       | 0.00    |
| <i>Glyma.13G168700</i> | 32.70  | 3.71     | 25.65         | 21.94             | 18.47  | 34.45  | 265.97 | 210.45     | 4.26    |
| <i>Glyma.13G190400</i> | 2.11   | 3.40     | 0.52          | 4.17              | 2.13   | 3.29   | 1.78   | 1.37       | 1.60    |
| <i>Glyma.13G172500</i> | 2.64   | 3.09     | 0.78          | 3.05              | 20.24  | 0.00   | 1.48   | 0.00       | 0.27    |
| <i>Glyma.13G341500</i> | 10.02  | 202.42   | 364.56        | 36.37             | 125.36 | 44.07  | 423.42 | 101.13     | 0.27    |
| <i>Glyma.13G330600</i> | 9.23   | 33.99    | 7.00          | 10.83             | 13.85  | 30.90  | 11.56  | 11.62      | 41.22   |
| <i>Glyma.13G341600</i> | 3.96   | 6.80     | 5.70          | 7.22              | 7.81   | 6.84   | 9.19   | 4.10       | 5.58    |
| <i>Glyma.13G333100</i> | 61.18  | 10.82    | 14.25         | 21.66             | 12.78  | 78.52  | 37.66  | 14.35      | 2.13    |
| <i>Glyma.13G341400</i> | 27.95  | 10.82    | 4.66          | 49.15             | 2.84   | 2.79   | 13.05  | 5.47       | 5.05    |
| <i>Glyma.13G343000</i> | 0.26   | 0.00     | 0.00          | 5.55              | 0.71   | 91.95  | 3.85   | 0.68       | 0.00    |
| <i>Glyma.13G334200</i> | 117.62 | 266.39   | 115.04        | 112.73            | 94.82  | 155.28 | 136.69 | 110.69     | 58.77   |
| <i>Glyma.13G331900</i> | 14.77  | 43.57    | 27.98         | 30.27             | 7.46   | 17.98  | 2.37   | 8.88       | 6.91    |
| <i>Glyma.13G224000</i> | 134.50 | 0.93     | 155.46        | 12.77             | 64.63  | 68.39  | 30.84  | 211.82     | 50.53   |

**Table S5.** Distribution of SNP markers mapped on soybean chromosome/linkage groups

| Chromosome | Linkage group | No. of markers | Distance (cM) | Density SNP/cM |
|------------|---------------|----------------|---------------|----------------|
| 1          | D1a           | 56             | 188.56        | 3.37           |
| 2          | D1b           | 88             | 293.83        | 3.33           |
| 3          | N             | 61             | 246.62        | 4.04           |
| 4          | C1            | 65             | 226.36        | 3.48           |
| 5          | A1            | 71             | 220.26        | 3.10           |

|                                        |    |      |         |      |
|----------------------------------------|----|------|---------|------|
| 6                                      | C2 | 62   | 211.06  | 3.40 |
| 7                                      | M  | 83   | 233.44  | 2.81 |
| 8                                      | A2 | 81   | 262.07  | 3.24 |
| 9                                      | K  | 65   | 212.68  | 3.27 |
| 10                                     | O  | 78   | 215.62  | 2.76 |
| 11                                     | B1 | 50   | 219.89  | 4.40 |
| 12                                     | H  | 59   | 281.99  | 4.78 |
| 13                                     | F  | 96   | 224.18  | 2.34 |
| 14                                     | B2 | 70   | 172.16  | 2.46 |
| 15                                     | E  | 71   | 198.24  | 2.79 |
| 16                                     | J  | 63   | 180.02  | 2.86 |
| 17                                     | D2 | 62   | 233.71  | 3.77 |
| 18                                     | G  | 86   | 198.24  | 2.30 |
| 19                                     | L  | 82   | 240.27  | 2.93 |
| 20                                     | I  | 59   | 167.50  | 2.84 |
| Total                                  |    | 1408 | 4426.70 | 3.14 |
| Average marker and distance/chromosome |    | 70.4 | 221.33  | 3.14 |

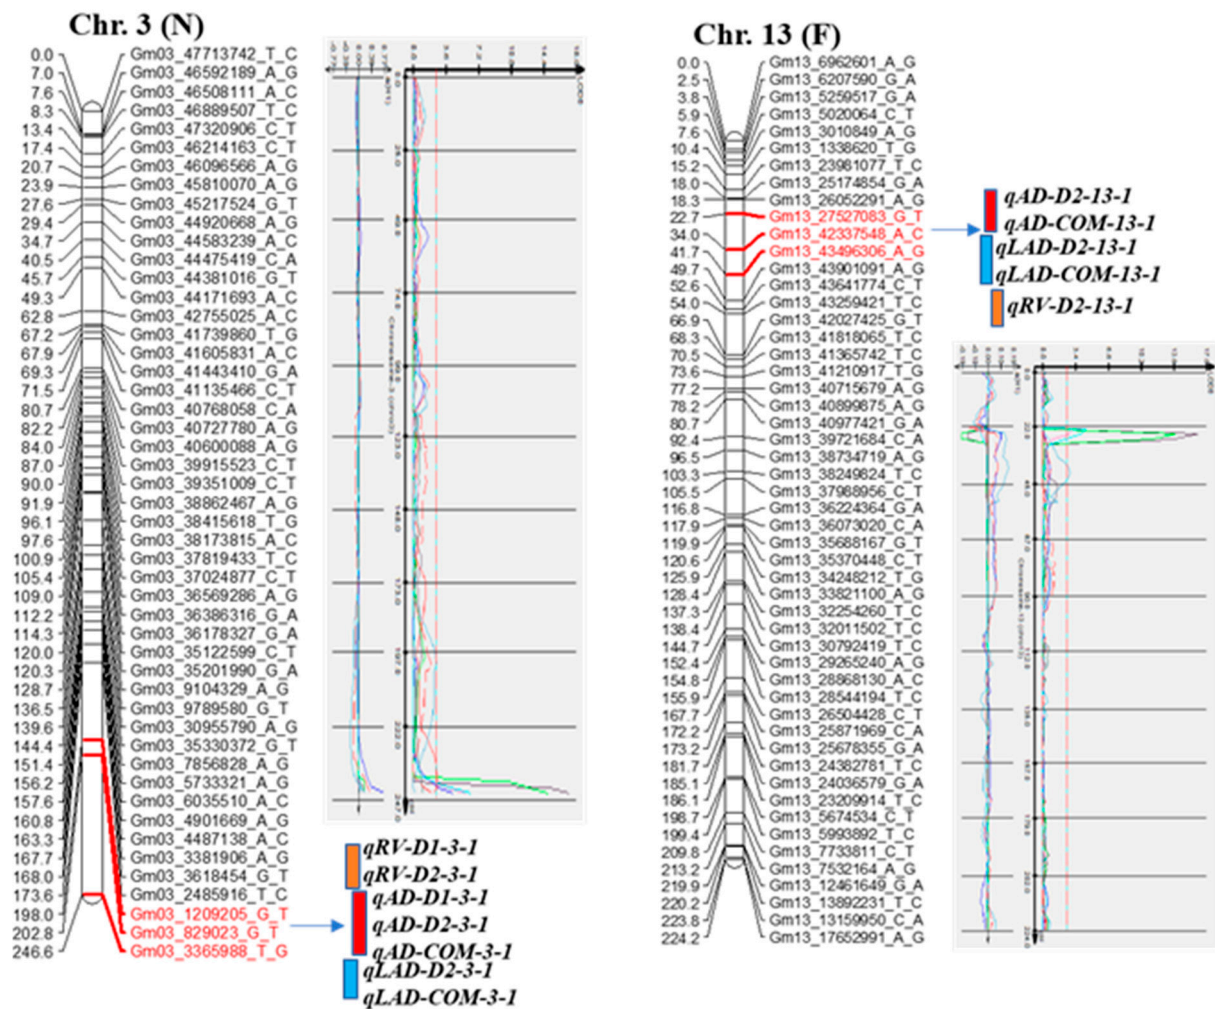

**Figure S1.** The most significant QTL regions with LOD distribution curve on chromosomes 3 and 13. Chr:

chromosome; AD: average diameter; RV: root volume; LAD: link average diameter. D1, D2, and COM indicate environment 1, environment 2, and combined environments, respectively. Different colors indicate different QTLs within same region.

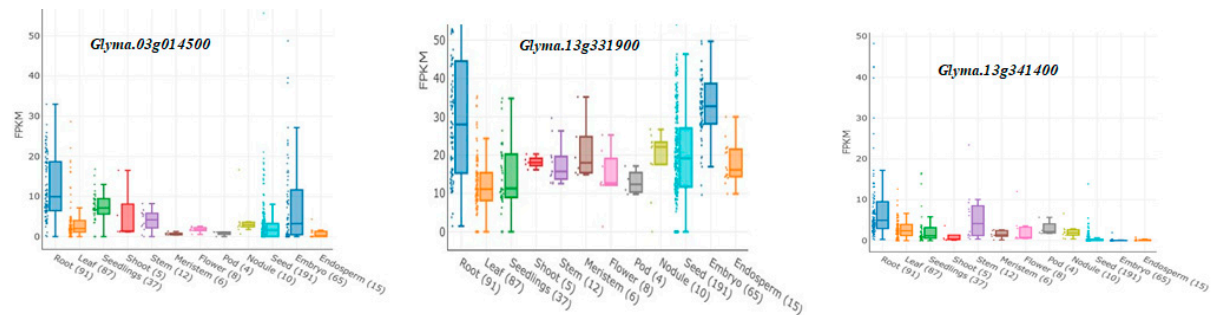

**Figure S2.** Expression patterns of three candidate genes across twelve different soybean tissues/organs (web-based publicly available RNA-Seq soybean libraries '4085') (<http://ipf.sustech.edu.-cn/pub/soybean/>). FPKM: fragments per kilobase of transcript per million mapped reads. The blue colored bar on the left indicates the expression level in the roots.
